# Supplementary material for: Novel photochemical reactions of carbocyclic diazodiketones without elimination of nitrogen – a suitable way to N-hydrazonation of C–H-bonds
Source: publisher site journal article supplement (doi:10.3762/bjoc.14.200), 2018-08-28

**Supporting Information**  
for  
**Novel photochemical reactions of carbocyclic diazodiketones  
without elimination of nitrogen – a suitable way to N-  
hydrazonation of C–H-bonds**

Liudmila L. Rodina<sup>1</sup>, Xenia V. Azarova<sup>1</sup>, Jury J. Medvedev<sup>1</sup>, Dmitrij V. Semenov<sup>2</sup> and  
Valerij A. Nikolaev<sup>1\*</sup>

Address: <sup>1</sup>Department of Organic Chemistry, St-Petersburg State University, 26  
University pr., 198504, Saint-Petersburg, Russia and <sup>2</sup>Skolkovo Institute of Science and  
Technology, 143026, Moscow, Skolkovo Innovation Center, 3 Nobel st., Russia

Email: Valerij A. Nikolaev\* - [valerij.nikolaev@gmail.com](mailto:valerij.nikolaev@gmail.com)

\*Corresponding author

NMR spectra of all new compounds and data of X-ray analysis for  
compounds **1c** (CCDC 1584937) and **2b** (CCDC 1584938)

**Table of contents:**

|                                                                                              |     |
|----------------------------------------------------------------------------------------------|-----|
| Molecular structure of diazodiketone <b>1c</b> .....                                         | S2  |
| Characteristics of UV absorption spectra of diazodiketones <b>1a–c</b> and sensitizers ..... | S3  |
| <sup>1</sup> H and <sup>13</sup> C NMR spectra of new compounds .....                        | S4  |
| X-Ray data for compounds <b>1c</b> and <b>2b</b> .....                                       | S13 |

## Molecular structure of diazoketone **1c**

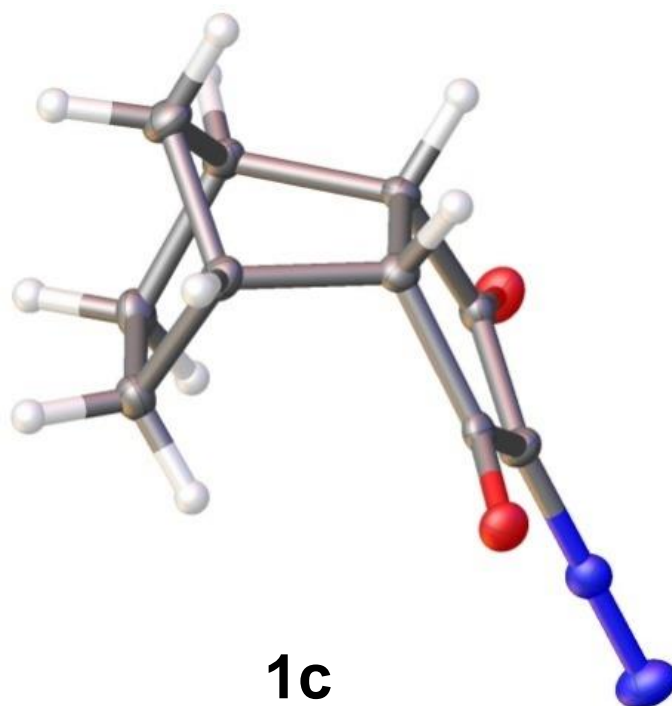

**Figure S1.** Molecular structure of diazodiketone **1c** according to the data of X-ray analysis (Olex2 plot with 50% probability level of ellipsoids).

## Characteristics of UV absorption spectra of diazodiketones 1a–c and sensitizers used

**Table S1.** The characteristics of the absorption bands in the UV spectra of diazodiketones **1a–c**

| Diazodiketone <b>1a–c</b> | $\lambda_{\text{max}}$ , nm | $\epsilon$ | lg ( $\epsilon$ ) |
|---------------------------|-----------------------------|------------|-------------------|
| <b>1a</b>                 | 216                         | 14800      | 4,2               |
|                           | 248                         | 13900      | 4,1               |
|                           | 311                         | 260        | 2,4               |
|                           | 363                         | 49         | 1,7               |
| <b>1b</b>                 | 222                         | 14900      | 4,2               |
|                           | 249                         | 19400      | 4,3               |
|                           | 316                         | 215        | 2,3               |
|                           | 366                         | 30         | 1,5               |
| <b>1c</b>                 | 221                         | 16000      | 4,2               |
|                           | 250                         | 16700      | 4,2               |
|                           | 315                         | 290        | 2,5               |
|                           | 367                         | 43         | 1,6               |

**Table S2.** Characteristics of the absorption spectra of sensitizers used

| Sensitizer       | $\lambda_{\text{max}}$ , nm | $\epsilon$ | lg ( $\epsilon$ ) | $E_i$ , (kcal/mol) |
|------------------|-----------------------------|------------|-------------------|--------------------|
| Acetophenone     | 240                         | 13900      | 4,1               | 74                 |
| Benzophenone     | 251                         | 27700      | 4,4               | 69                 |
| Michler's ketone | 242                         | 17400      | 4,2               | 64                 |
|                  | 346                         | 43000      | 4,6               |                    |

# <sup>1</sup>H and <sup>13</sup>C NMR of compound **2a**

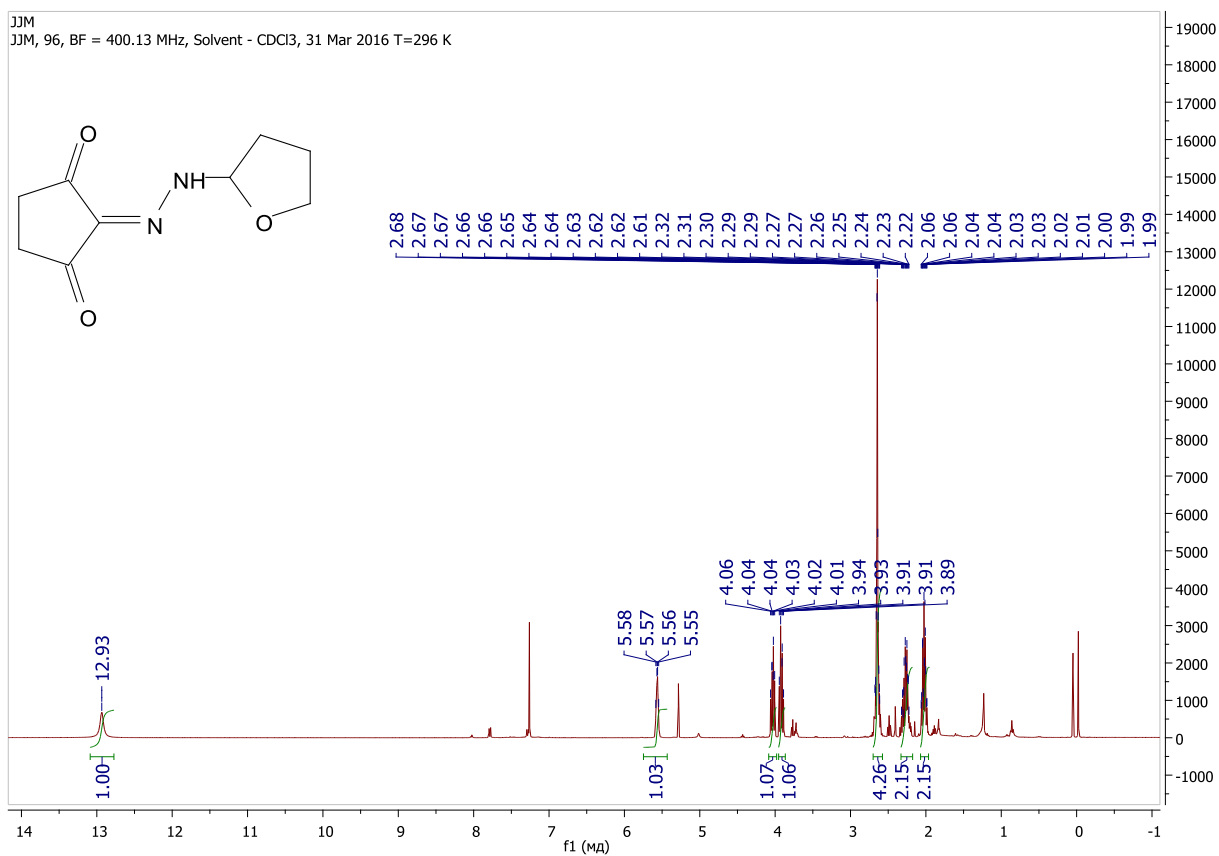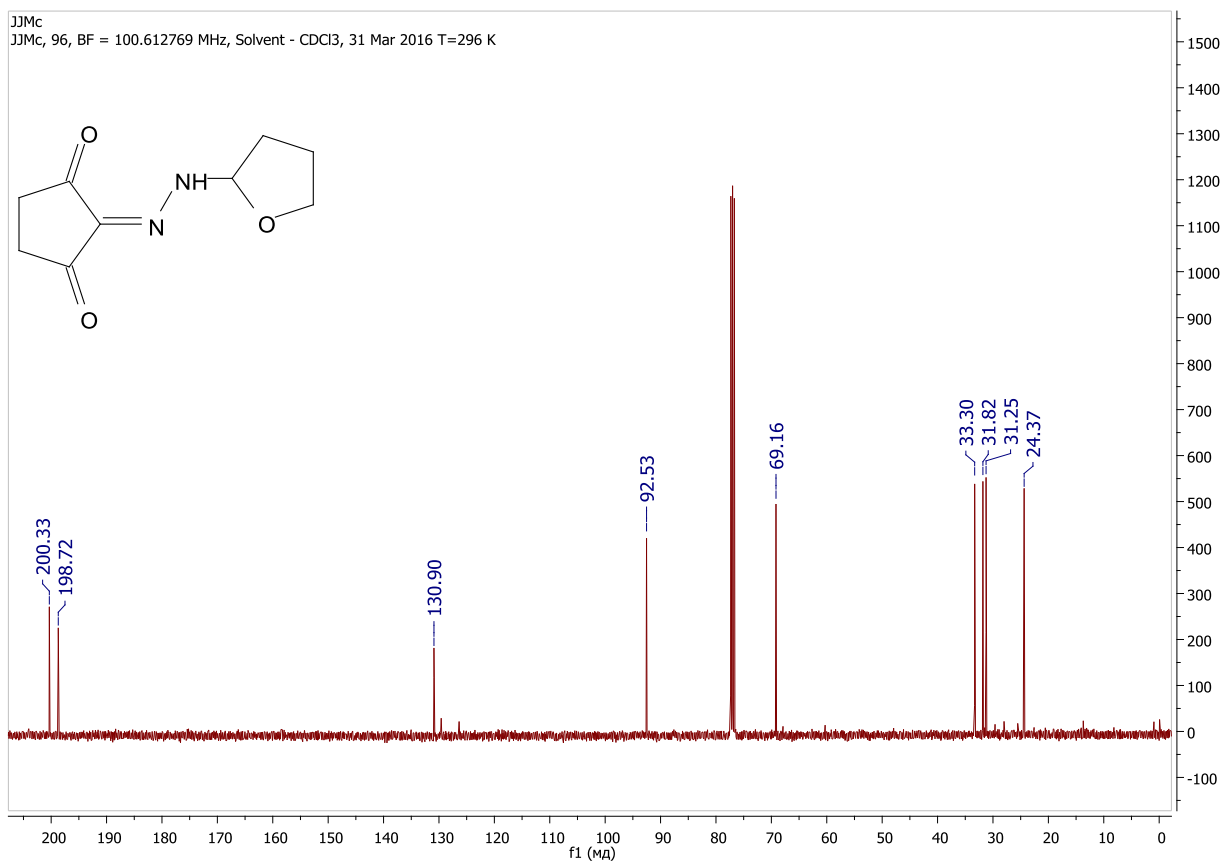

# <sup>1</sup>H and <sup>13</sup>C NMR of compound **2b**

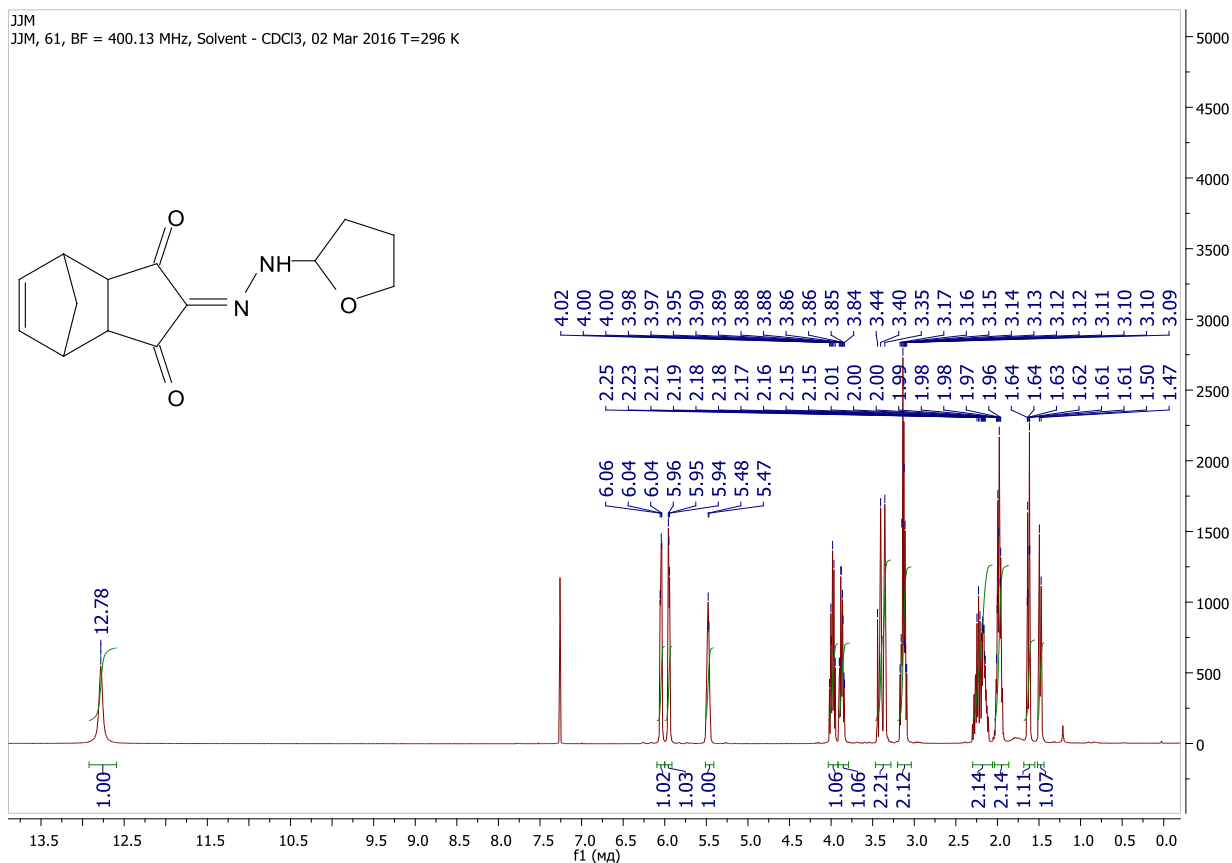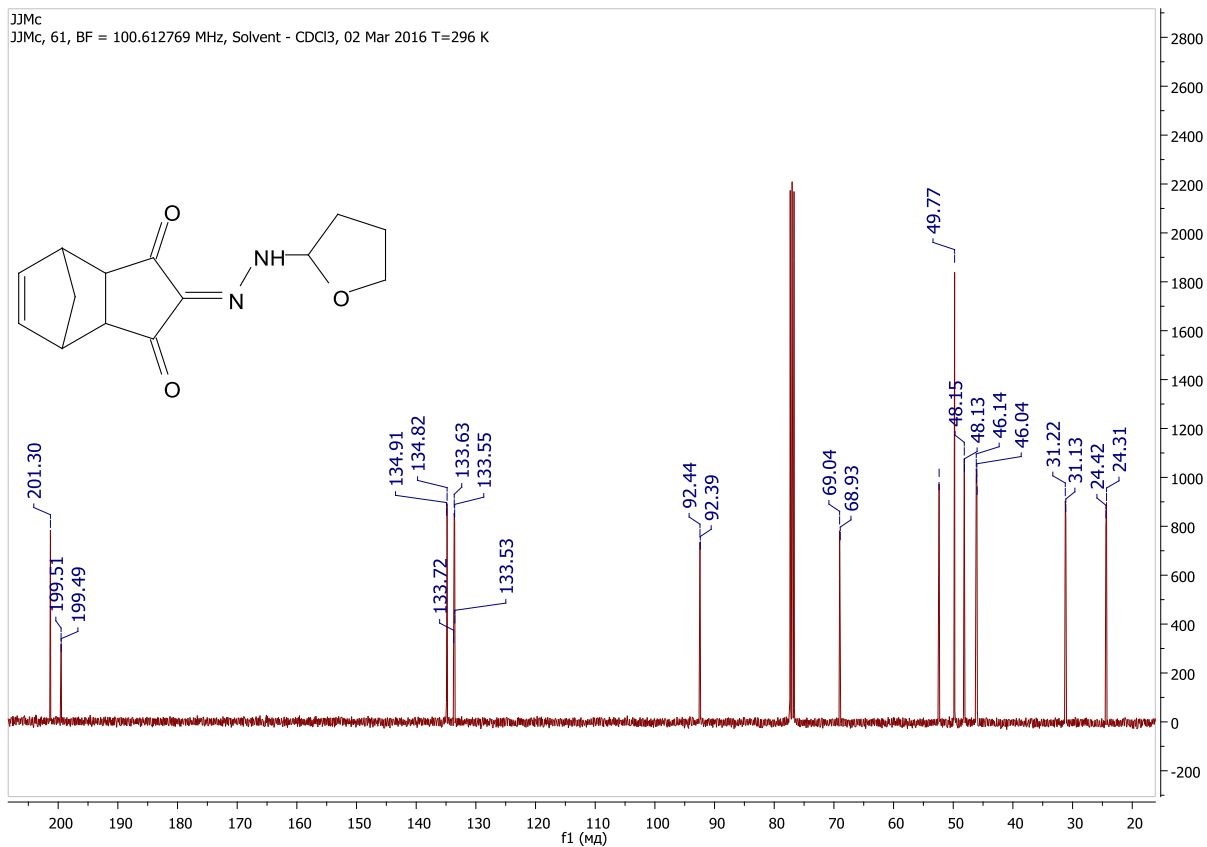

# <sup>1</sup>H and <sup>13</sup>C NMR of compound **2c** (in acetone-*d*<sub>6</sub>)

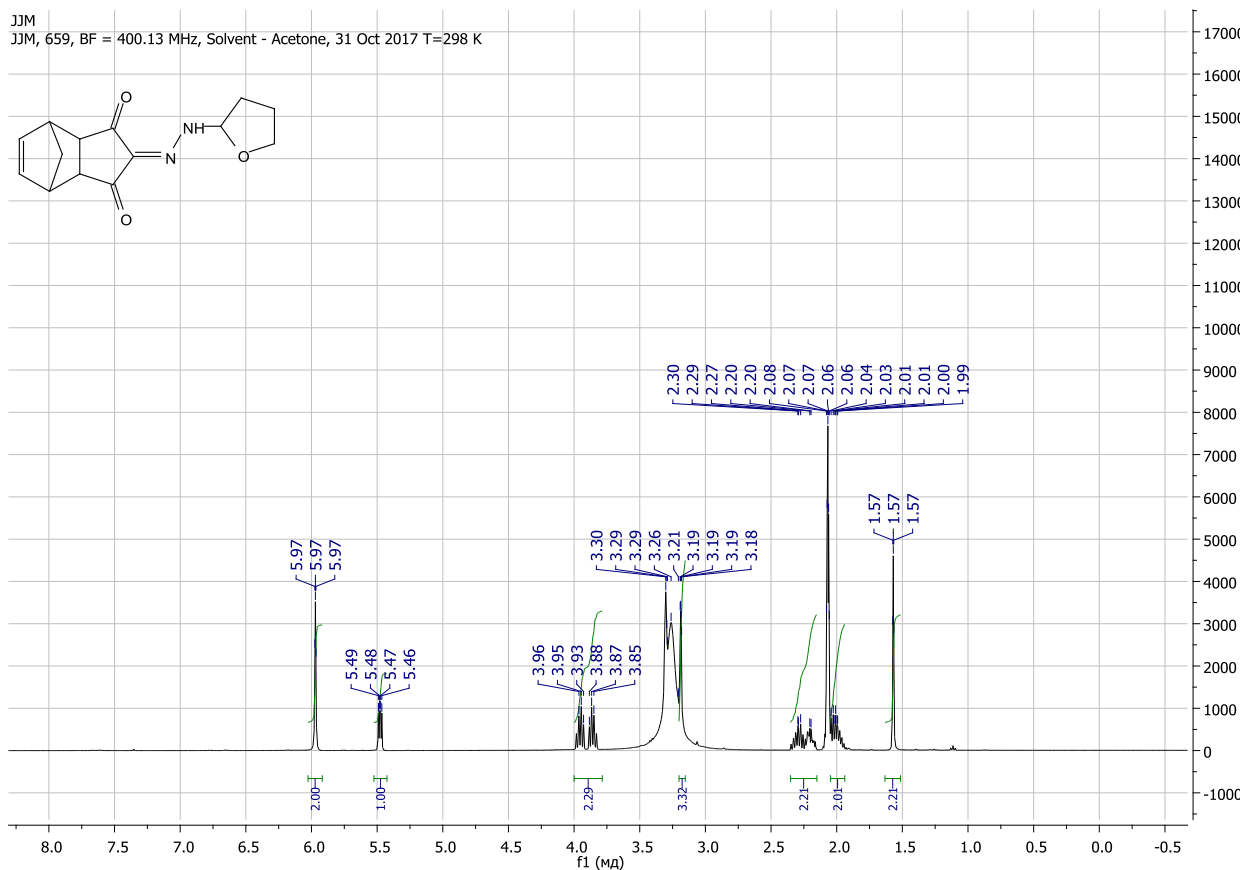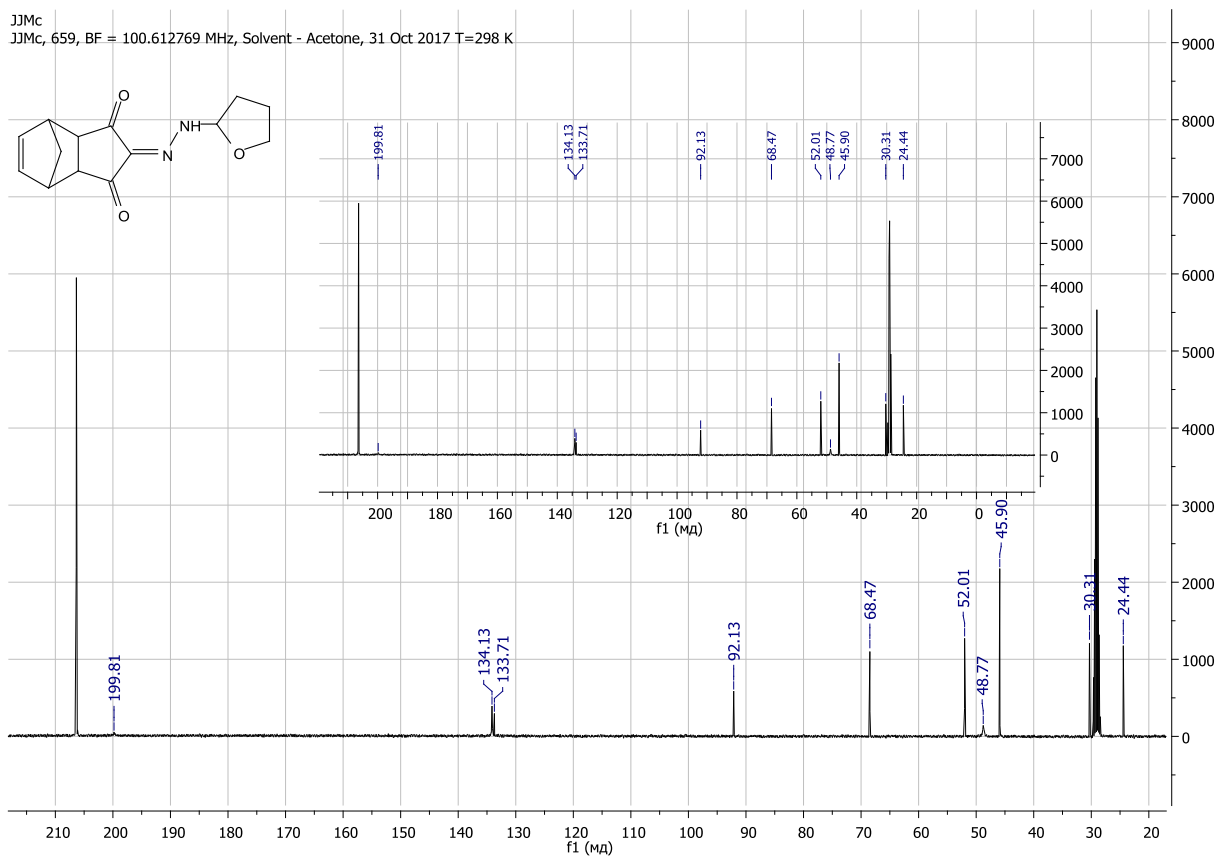

# $^1\text{H}$ and $^{13}\text{C}$ NMR of compound **2c**

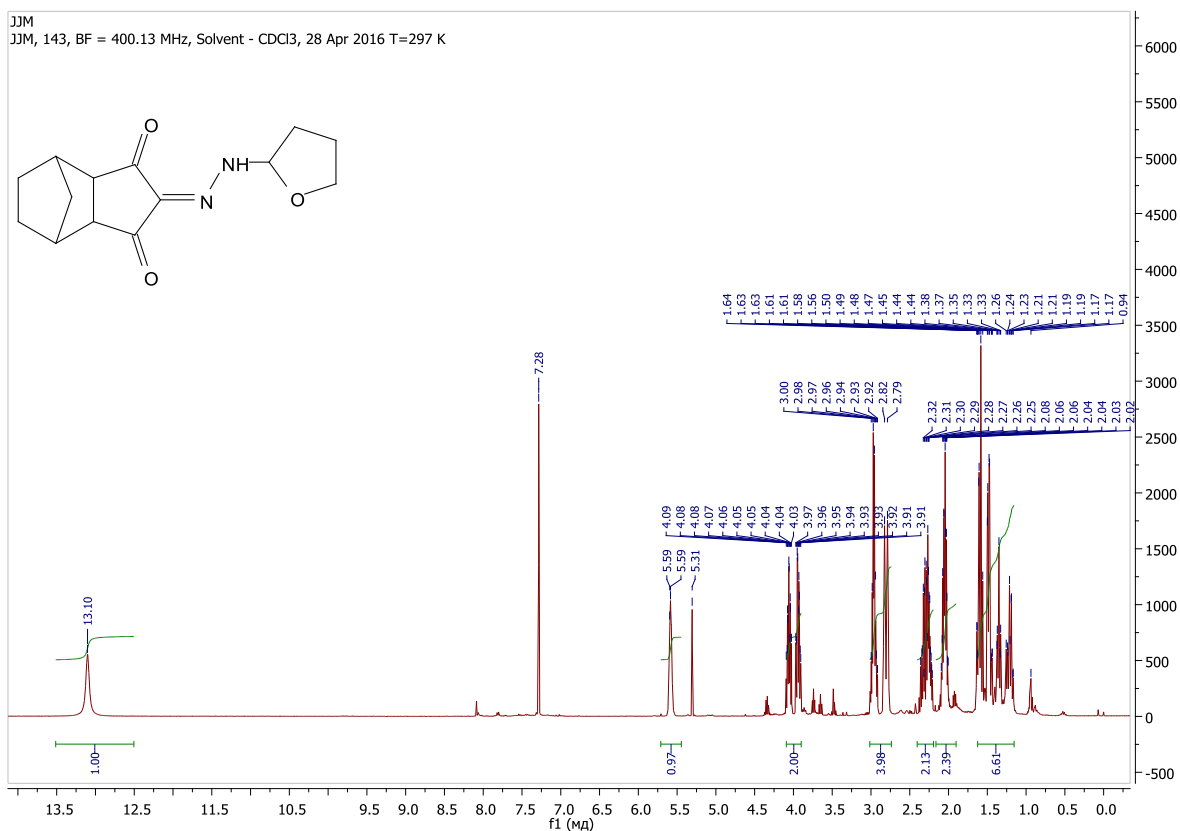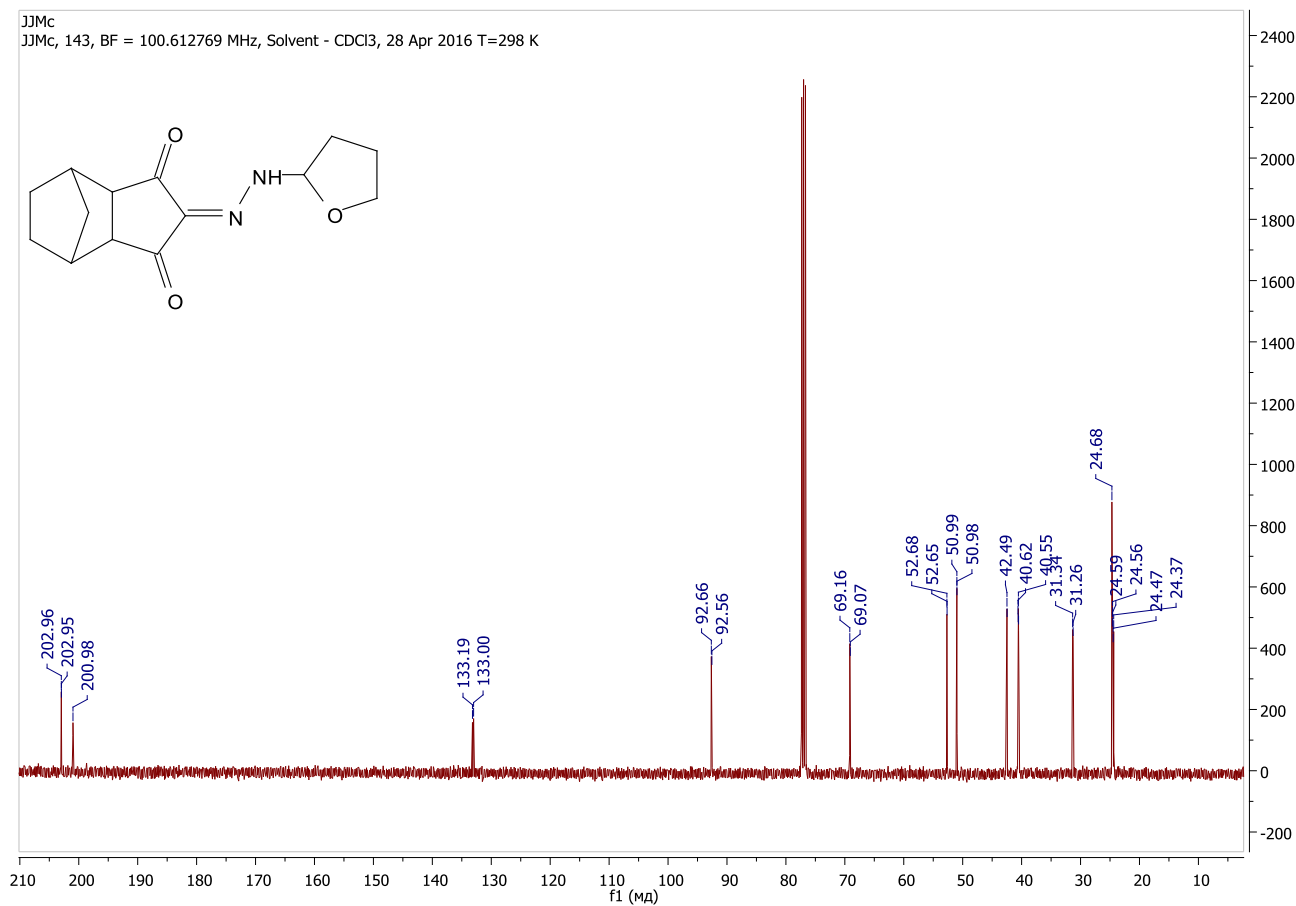

# <sup>1</sup>H and <sup>13</sup>C NMR of compound **2d**

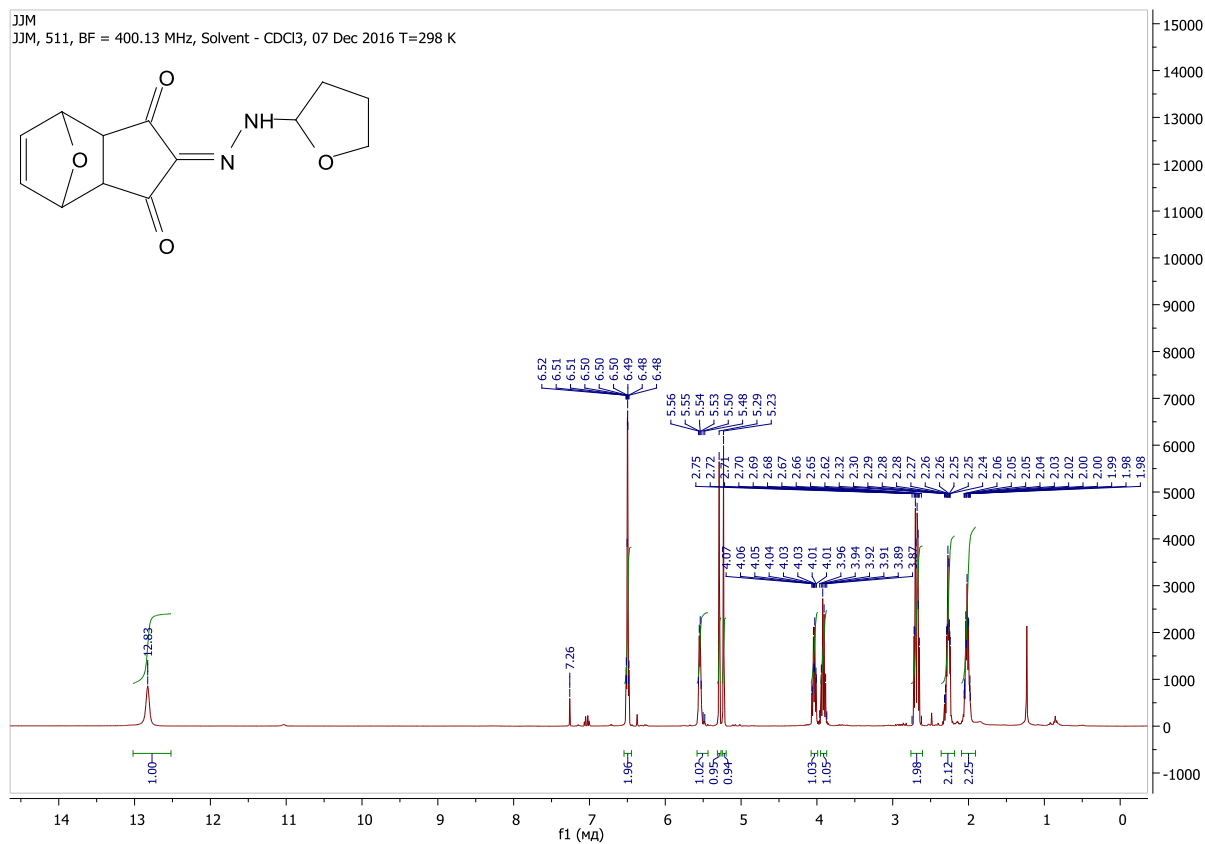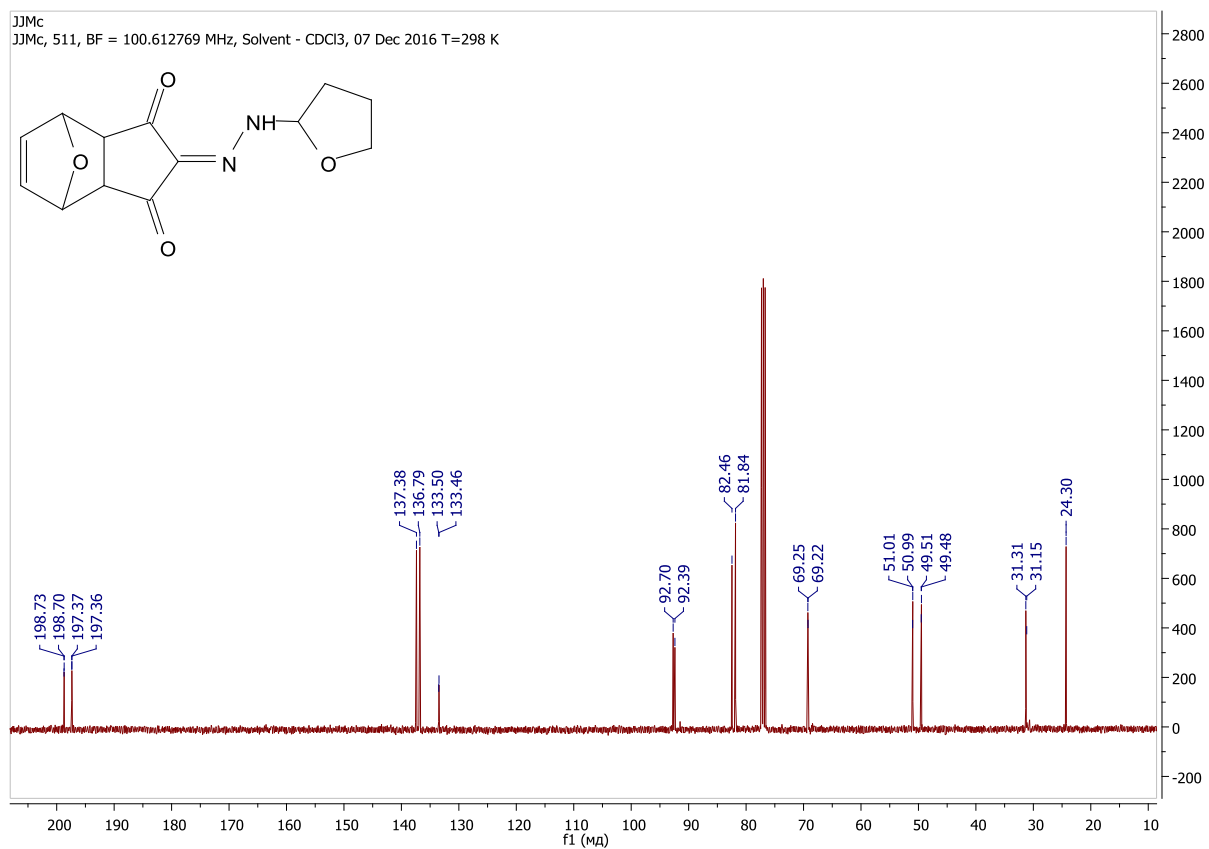



# <sup>1</sup>H and <sup>13</sup>C NMR of compound **2f**

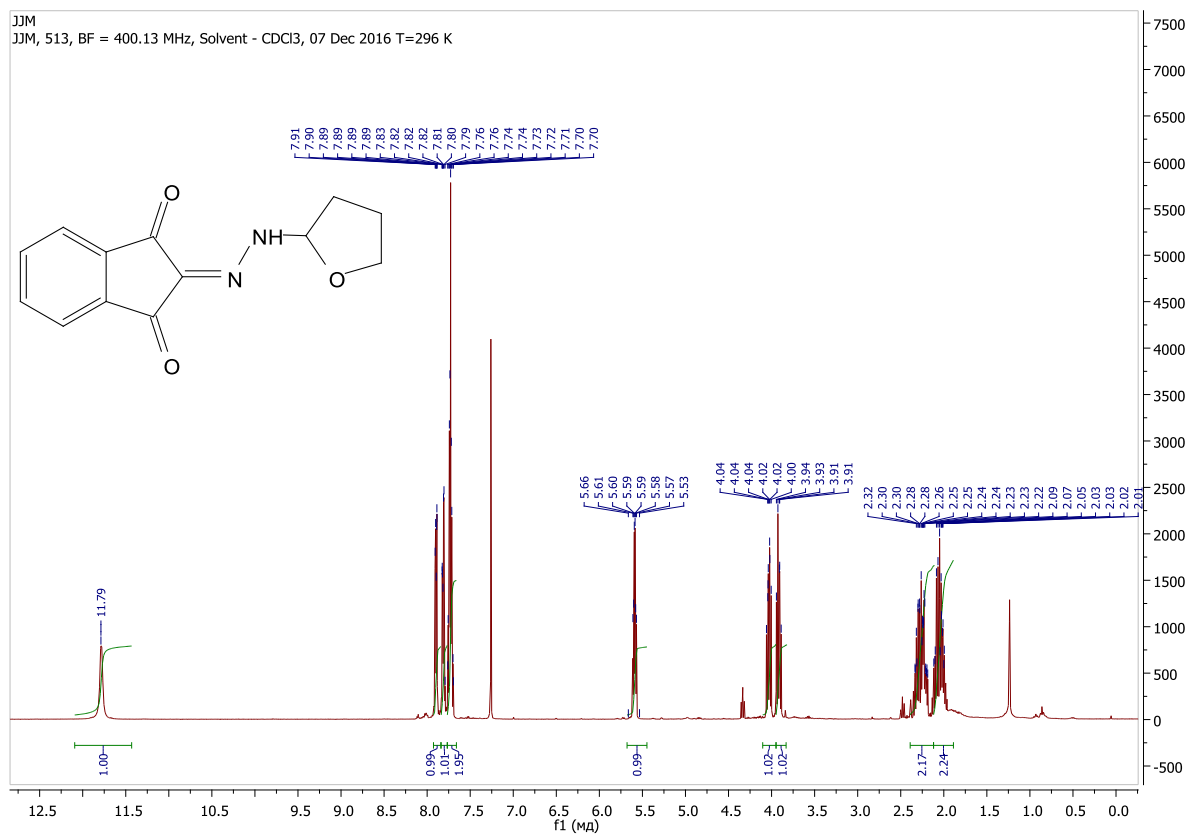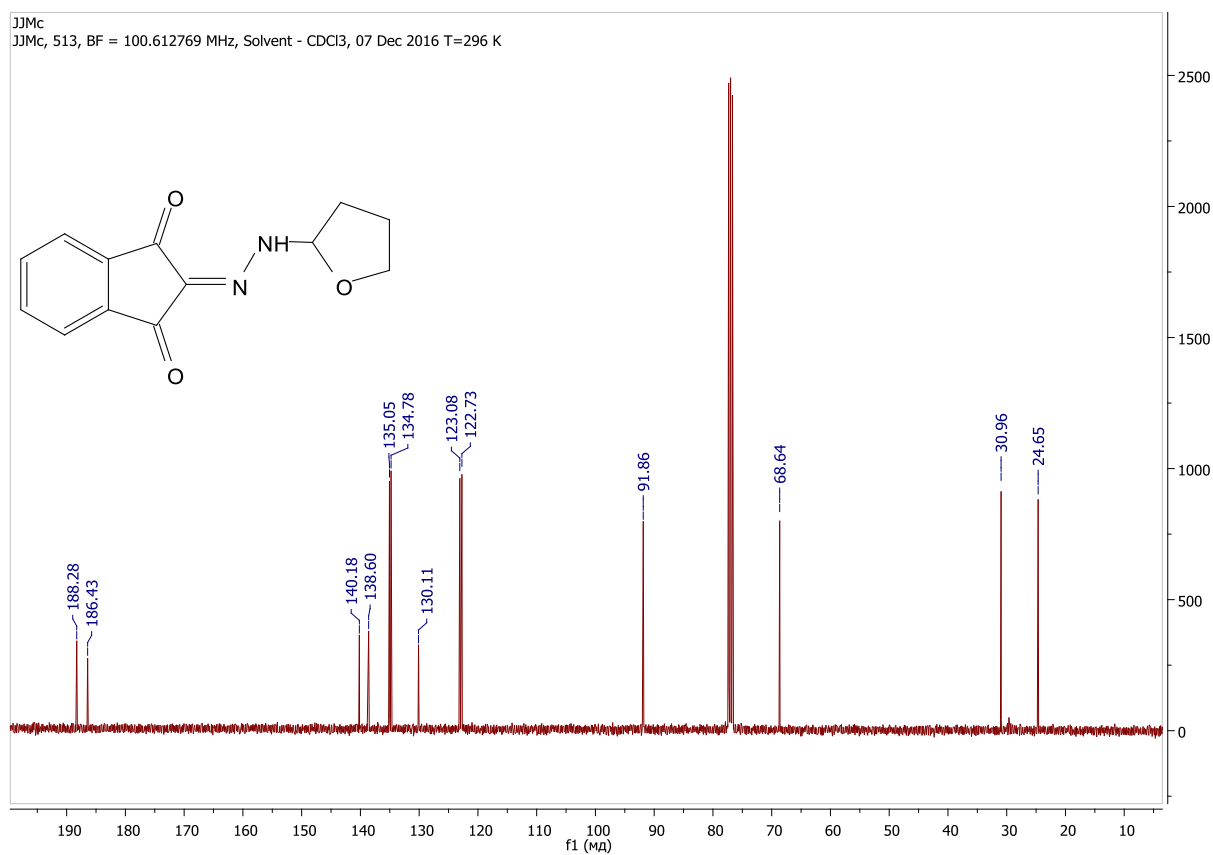

# <sup>1</sup>H and <sup>13</sup>C NMR of compound **3**

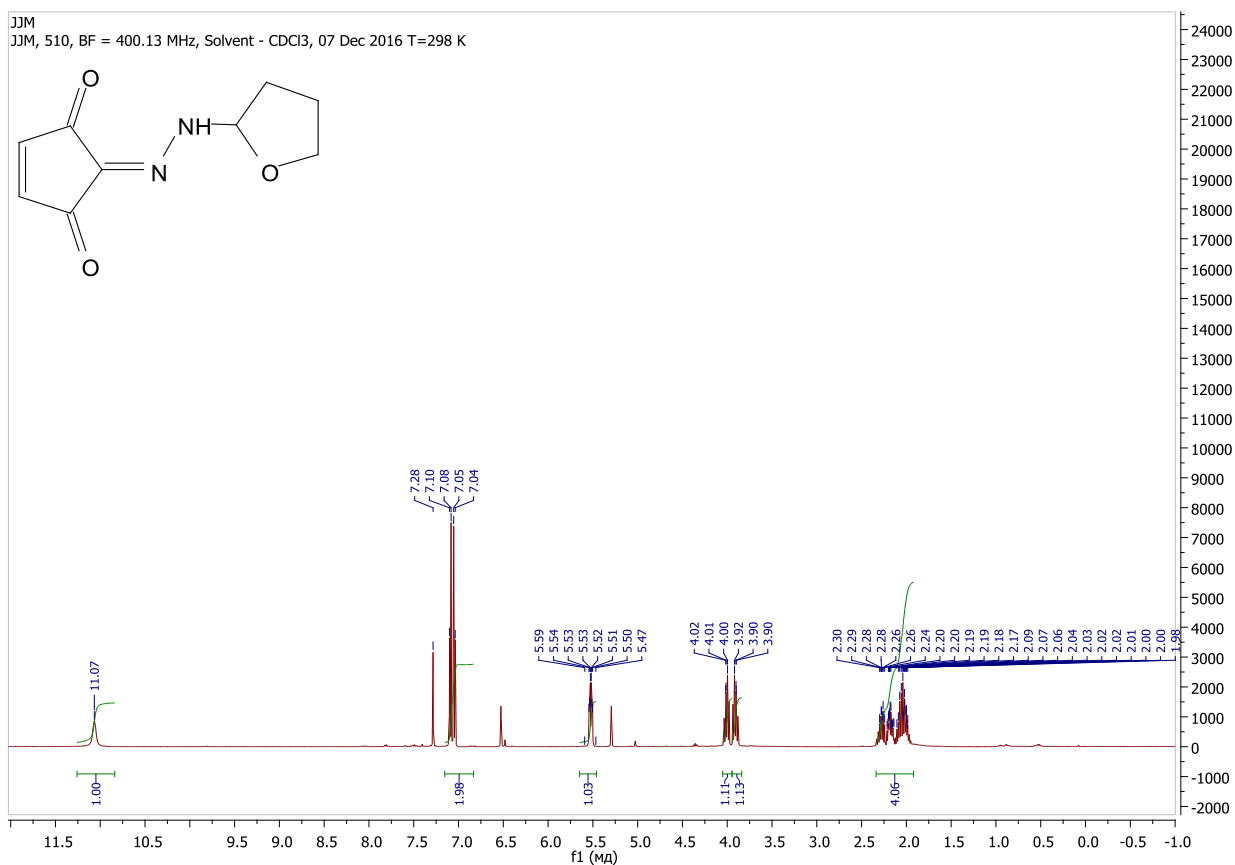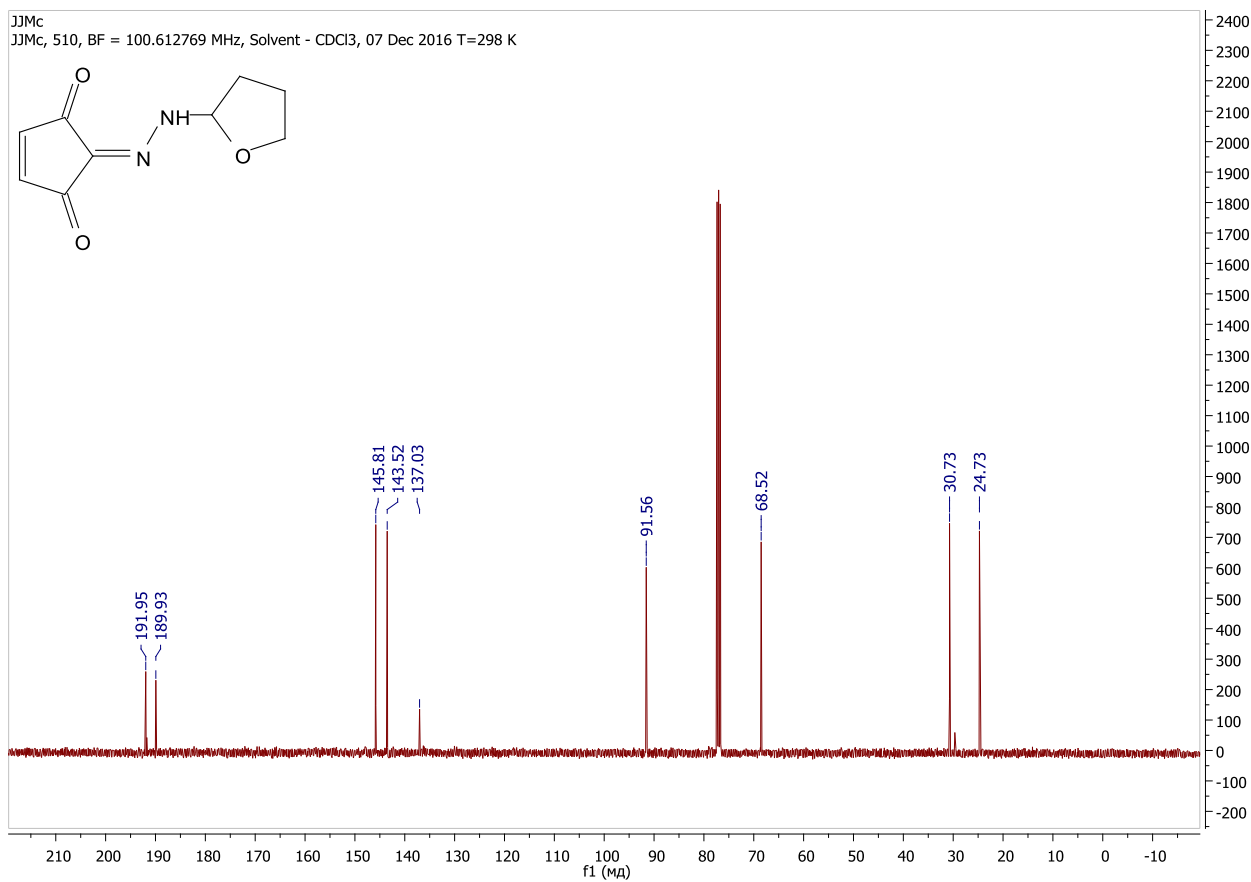

# <sup>1</sup>H and <sup>13</sup>C NMR of compound **5b**

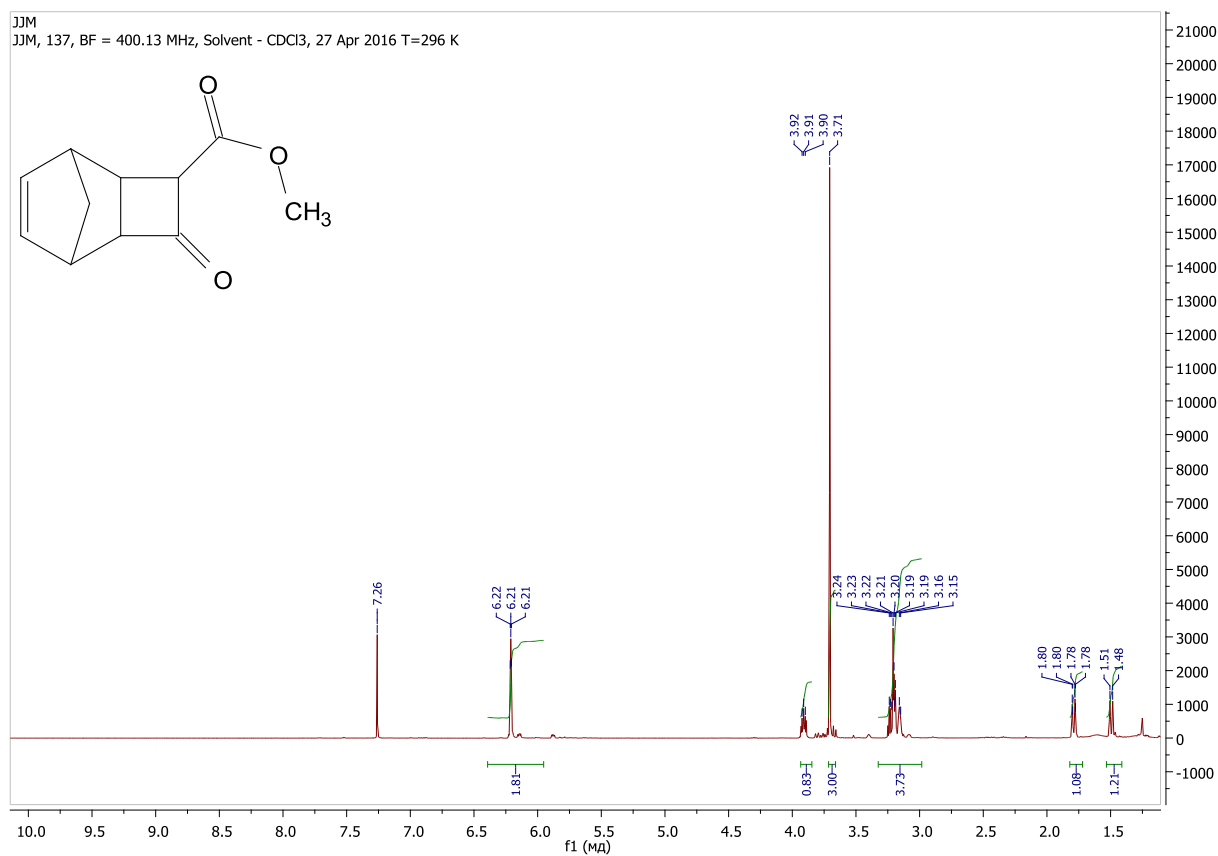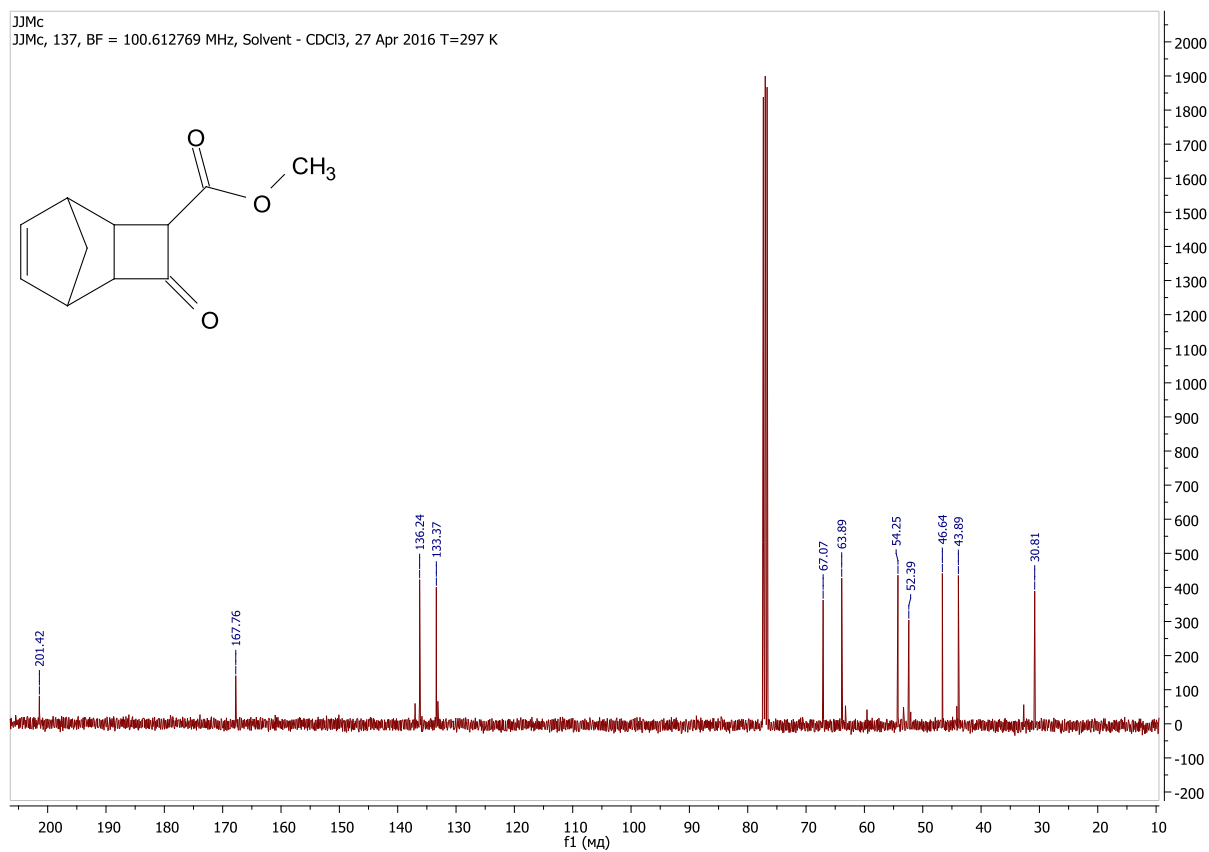

# <sup>1</sup>H and <sup>13</sup>C NMR of compound **5c**

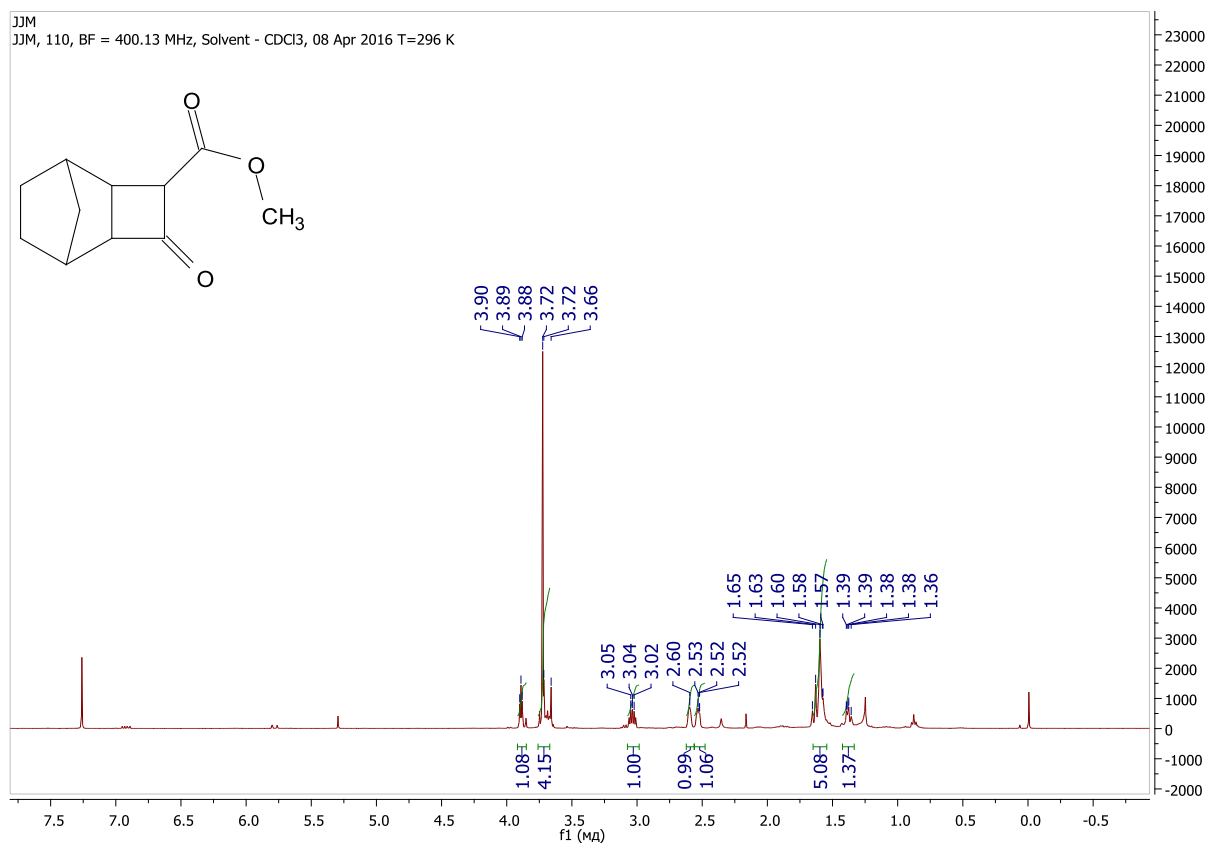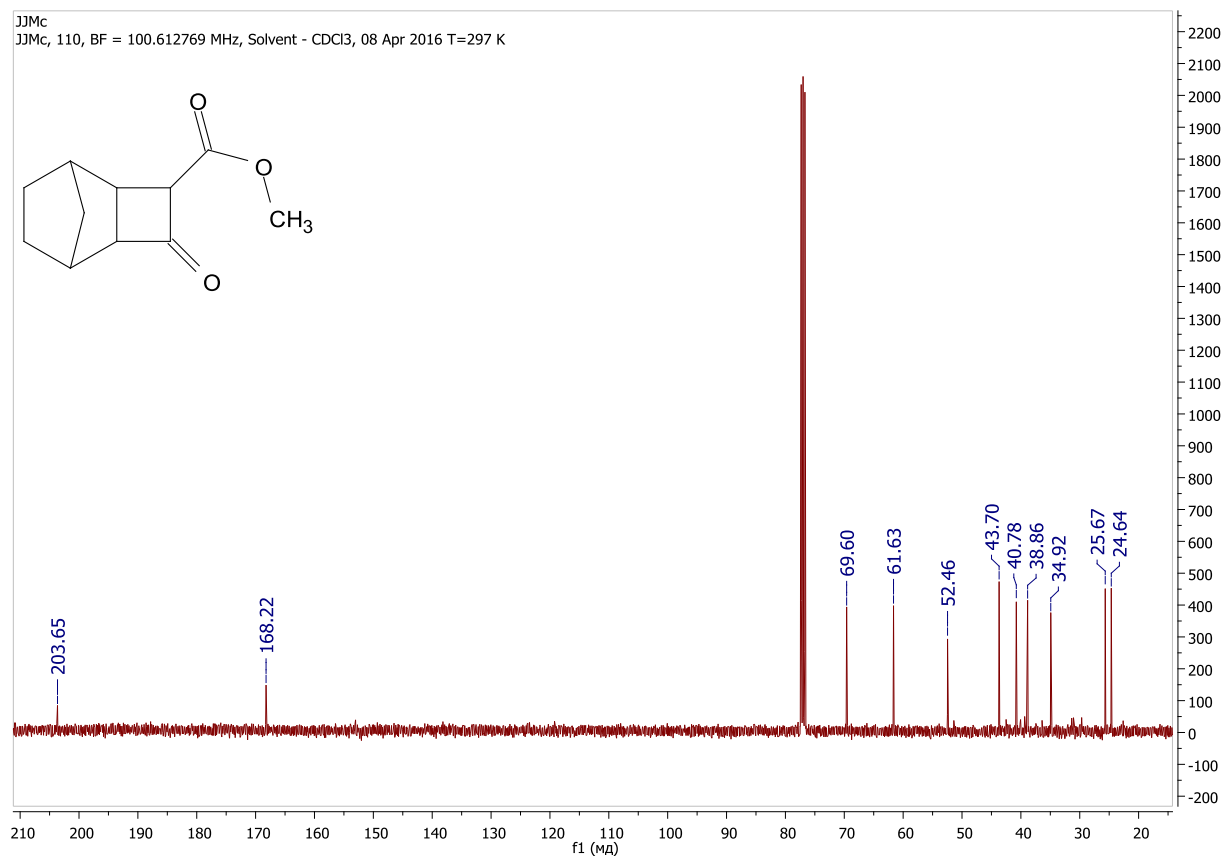

## checkCIF/PLATON report (X-Ray data for compound 2b)

You have not supplied any structure factors. As a result the full set of tests cannot be run.

THIS REPORT IS FOR GUIDANCE ONLY. IF USED AS PART OF A REVIEW PROCEDURE FOR PUBLICATION, IT SHOULD NOT REPLACE THE EXPERTISE OF AN EXPERIENCED CRYSTALLOGRAPHIC REFEREE.

No syntax errors found. CIF dictionary Interpreting this report

### Datablock: jjm\_i1

---

|                        |                                 |                                  |
|------------------------|---------------------------------|----------------------------------|
| Bond precision:        | C-C = 0.0031 Å                  | Wavelength=0.71073               |
| Cell:                  | a=7.6262 (5)                    | b=17.4605 (10) c=9.4488 (6)      |
|                        | alpha=90                        | beta=101.673 (6) gamma=90        |
| Temperature:           | 100 K                           |                                  |
|                        | Calculated                      | Reported                         |
| Volume                 | 1232.16 (14)                    | 1232.15 (13)                     |
| Space group            | P 21/c                          | P 1 21/c 1                       |
| Hall group             | -P 2ybc                         | -P 2ybc                          |
| Moiety formula         | C14 H16 N2 O3                   | C14 H16 N2 O3                    |
| Sum formula            | C14 H16 N2 O3                   | C14 H16 N2 O3                    |
| Mr                     | 260.29                          | 260.29                           |
| Dx, g cm <sup>-3</sup> | 1.403                           | 1.403                            |
| Z                      | 4                               | 4                                |
| Mu (mm <sup>-1</sup> ) | 0.100                           | 0.100                            |
| F000                   | 552.0                           | 552.0                            |
| F000'                  | 552.26                          |                                  |
| h, k, lmax             | 9, 22, 12                       | 9, 22, 12                        |
| Nref                   | 2831                            | 2817                             |
| Tmin, Tmax             | 0.976, 0.980                    | 0.854, 1.000                     |
| Tmin'                  | 0.975                           |                                  |
| Correction method=     | # Reported T Limits: Tmin=0.854 |                                  |
| Tmax=1.000 AbsCorr =   | MULTI-SCAN                      |                                  |
| Data completeness=     | 0.995                           | Theta(max)= 27.493               |
| R(reflections)=        | 0.0582 ( 2247)                  | wR2(reflections)= 0.1519 ( 2817) |
| S =                    | 1.073                           | Npar= 172                        |

---

The following ALERTS were generated. Each ALERT has the format  
**test-name\_ALERT\_alert-type\_alert-level.**  
Click on the hyperlinks for more details of the test.

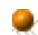

### Alert level B

PLAT097\_ALERT\_2\_B Large Reported Max.

(Positive) Residual Density

0.86 eA-3

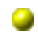

### Alert level C

DIFMX02\_ALERT\_1\_C The maximum difference density is  $> 0.1 * Z_{MAX} * 0.75$  The relevant atom site should be identified.

PLAT094\_ALERT\_2\_C Ratio of Maximum / Minimum Residual Density ....

2.76 Report

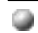

### Alert level G

PLAT007\_ALERT\_5\_G Number of Unrefined Donor-H Atoms ..... 1 Report PLAT398\_ALERT\_2\_G Deviating C-O-C Angle From 120 for O2 107.9 Degree

PLAT793\_ALERT\_4\_G Model has Chirality at C9 (Centro SPGR) S Verify PLAT793\_ALERT\_4\_G Model has Chirality at C10 (Centro SPGR) R Verify PLAT793\_ALERT\_4\_G Model has Chirality at C12 (Centro SPGR) S Verify PLAT793\_ALERT\_4\_G Model has Chirality at C14 (Centro SPGR) S Verify PLAT793\_ALERT\_4\_G Model has Chirality at C16 (Centro SPGR) R Verify PLAT933\_ALERT\_2\_G Number of OMIT Records in Embedded .res File ... 3 Note

0 **ALERT level A** = Most likely a serious problem - resolve or explain

1 **ALERT level B** = A potentially serious problem, consider carefully

2 **ALERT level C** = Check. Ensure it is not caused by an omission or oversight

8 **ALERT level G** = General information/check it is not something unexpected

1 ALERT type 1 CIF construction/syntax error, inconsistent or missing data

4 ALERT type 2 Indicator that the structure model may be wrong or deficient

0 ALERT type 3 Indicator that the structure quality may be low

5 ALERT type 4 Improvement, methodology, query or suggestion

1 ALERT type 5 Informative message, check

It is advisable to attempt to resolve as many as possible of the alerts in all categories. Often the minor alerts point to easily fixed oversights, errors and omissions in your CIF or refinement strategy, so attention to these fine details can be worthwhile. In order to resolve some of the more serious problems it may be necessary to carry out additional measurements or structure refinements. However, the purpose of your study may justify the reported deviations and the more serious of these should normally be commented upon in the discussion or experimental section of a paper or in the "special\_details" fields of the CIF. checkCIF was carefully designed to identify outliers and unusual parameters, but every test has its limitations and alerts that are not important in a particular case may appear. Conversely, the absence of alerts does not guarantee there are no aspects of the results needing attention. It is up to the individual to critically assess their own results and, if necessary, seek expert advice.

### **Publication of your CIF in IUCr journals**

A basic structural check has been run on your CIF. These basic checks will be run on all CIFs submitted for publication in IUCr journals (*Acta Crystallographica*, *Journal of Applied Crystallography*, *Journal of Synchrotron Radiation*); however, if you intend to submit to *Acta Crystallographica Section C* or *E* or *IUCrData*, you should make sure that full publication checks are run on the final version of your CIF prior to submission.

### **Publication of your CIF in other journals**

Please refer to the *Notes for Authors* of the relevant journal for any special instructions relating to CIF submission.

---

**PLATON version of 09/11/2017; check.def file version of 08/11/2017**

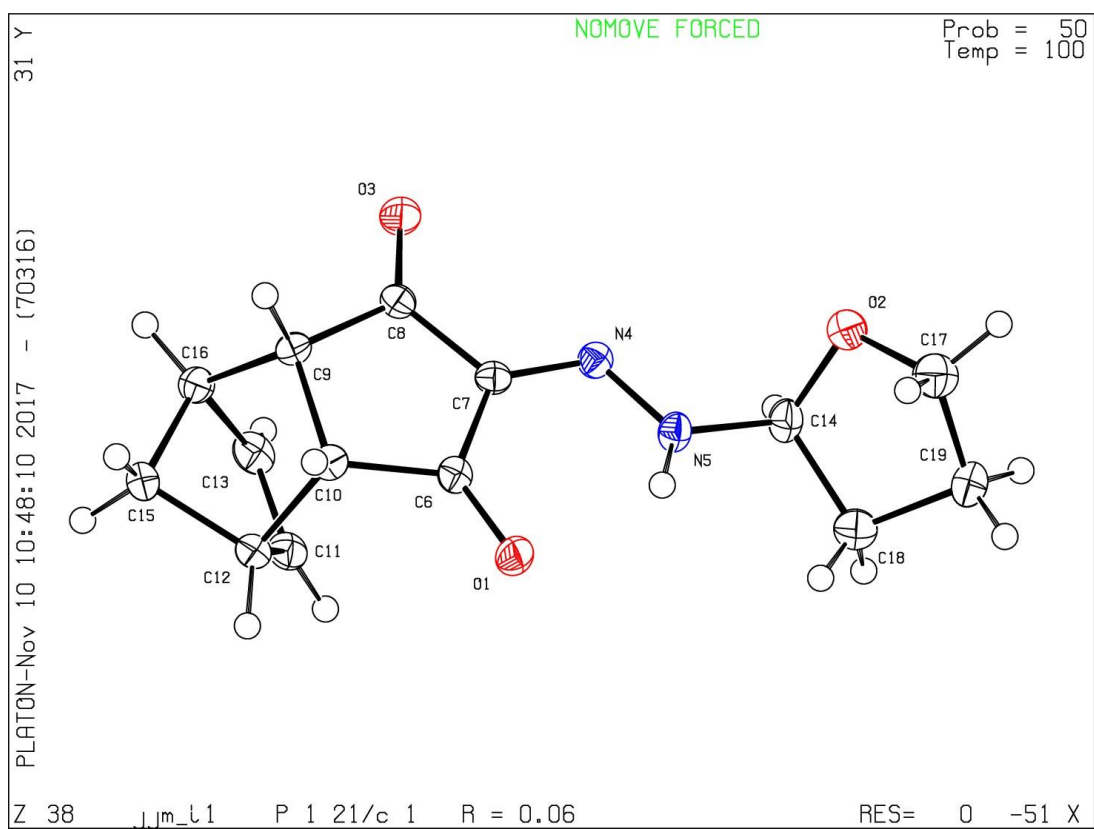



## checkCIF/PLATON report (X-Ray data for compound 1c)

You have not supplied any structure factors. As a result the full set of tests cannot be run.

THIS REPORT IS FOR GUIDANCE ONLY. IF USED AS PART OF A REVIEW PROCEDURE FOR PUBLICATION, IT SHOULD NOT REPLACE THE EXPERTISE OF AN EXPERIENCED CRYSTALLOGRAPHIC REFEREE.

No syntax errors found. CIF dictionary Interpreting this report

### Datablock: 103-5182-4058\_jjm\_092

---

Bond precision: C-C = 0.0016 Å Wavelength=0.71073

Cell: a=9.6650 (4) b=9.3156 (4) c=19.4448 (9)  
alpha=90 beta=90 gamma=90  
Temperature: 100 K

|                        | Calculated    | Reported      |
|------------------------|---------------|---------------|
| Volume                 | 1750.72 (13)  | 1750.73 (14)  |
| Space group            | P b c a       | P b c a       |
| Hall group             | -P 2ac 2ab    | -P 2ac 2ab    |
| Moiety formula         | C10 H10 N2 O2 | C10 H10 N2 O2 |
| Sum formula            | C10 H10 N2 O2 | C10 H10 N2 O2 |
| Mr                     | 190.20        | 190.20        |
| Dx, g cm <sup>-3</sup> | 1.443         | 1.443         |
| Z                      | 8             | 8             |
| Mu (mm <sup>-1</sup> ) | 0.103         | 0.103         |
| F000                   | 800.0         | 800.0         |
| F000'                  | 800.37        |               |
| h, k, lmax             | 12, 12, 25    | 12, 12, 25    |
| Nref                   | 2010          | 2010          |
| Tmin, Tmax             |               | 0.755, 1.000  |
| Tmin'                  |               |               |

Correction method= # Reported T Limits: Tmin=0.755 Tmax=1.000  
AbsCorr = MULTISCAN

Data completeness= 1.000 Theta(max)= 27.494

R(reflections)= 0.0364 ( 1755) wR2(reflections)= 0.0969 ( 2010)

S = 1.059 Npar= 127

---

The following ALERTS were generated. Each ALERT has the format

**test-name\_ALERT\_alert-type\_alert-level.**

Click on the hyperlinks for more details of the test.

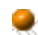**Alert level B**

PLAT230\_ALERT\_2\_B Hirshfeld Test Diff for                      N1                      --C2                      ..                      7.1 s.u.

**Alert level C**

CRYSC01\_ALERT\_1\_C No recognised colour has been given for crystal colour. PLAT053\_ALERT\_1\_C Minimum Crystal Dimension Missing (or Error) ...                      Please Check  
 PLAT054\_ALERT\_1\_C Medium                      Crystal Dimension Missing (or Error) ...                      Please Check  
 PLAT055\_ALERT\_1\_C Maximum Crystal Dimension Missing (or Error) ...                      Please Check

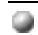**Alert level G**

PLAT793\_ALERT\_4\_G Model has Chirality at C4                      (Centro SPGR)                      R Verify  
 PLAT793\_ALERT\_4\_G Model has Chirality at C5                      (Centro SPGR)                      R Verify  
 PLAT793\_ALERT\_4\_G Model has Chirality at C8                      (Centro SPGR)                      S Verify  
 PLAT793\_ALERT\_4\_G Model has Chirality at C9                      (Centro SPGR)                      S Verify

0 **ALERT level A** = Most likely a serious problem - resolve or explain

1 **ALERT level B** = A potentially serious problem, consider carefully

4 **ALERT level C** = Check. Ensure it is not caused by an omission or oversight

4 **ALERT level G** = General information/check it is not something unexpected

4 ALERT type 1 CIF construction/syntax error, inconsistent or missing data

1 ALERT type 2 Indicator that the structure model may be wrong or deficient

0 ALERT type 3 Indicator that the structure quality may be low

4 ALERT type 4 Improvement, methodology, query or suggestion

0 ALERT type 5 Informative message, check

It is advisable to attempt to resolve as many as possible of the alerts in all categories. Often the minor alerts point to easily fixed oversights, errors and omissions in your CIF or refinement strategy, so attention to these fine details can be worthwhile. In order to resolve some of the more serious problems it may be necessary to carry out additional measurements or structure refinements. However, the purpose of your study may justify the reported deviations and the more serious of these should normally be commented upon in the discussion or experimental section of a paper or in the "special\_details" fields of the CIF. checkCIF was carefully designed to identify outliers and unusual parameters, but every test has its limitations and alerts that are not important in a particular case may appear. Conversely, the absence of alerts does not guarantee there are no aspects of the results needing attention. It is up to the individual to critically assess their own results and, if necessary, seek expert advice.

**Publication of your CIF in IUCr journals**

A basic structural check has been run on your CIF. These basic checks will be run on all CIFs submitted for publication in IUCr journals (*Acta Crystallographica*, *Journal of Applied Crystallography*, *Journal of Synchrotron Radiation*); however, if you intend to submit to *Acta Crystallographica Section C* or *E* or *IUCrData*, you should make sure that full publication checks are run on the final version of your CIF prior to submission.

**Publication of your CIF in other journals**

Please refer to the *Notes for Authors* of the relevant journal for any special instructions relating to CIF submission.

Datablock 103-5182-4058\_jjm\_092 - ellipsoid plot

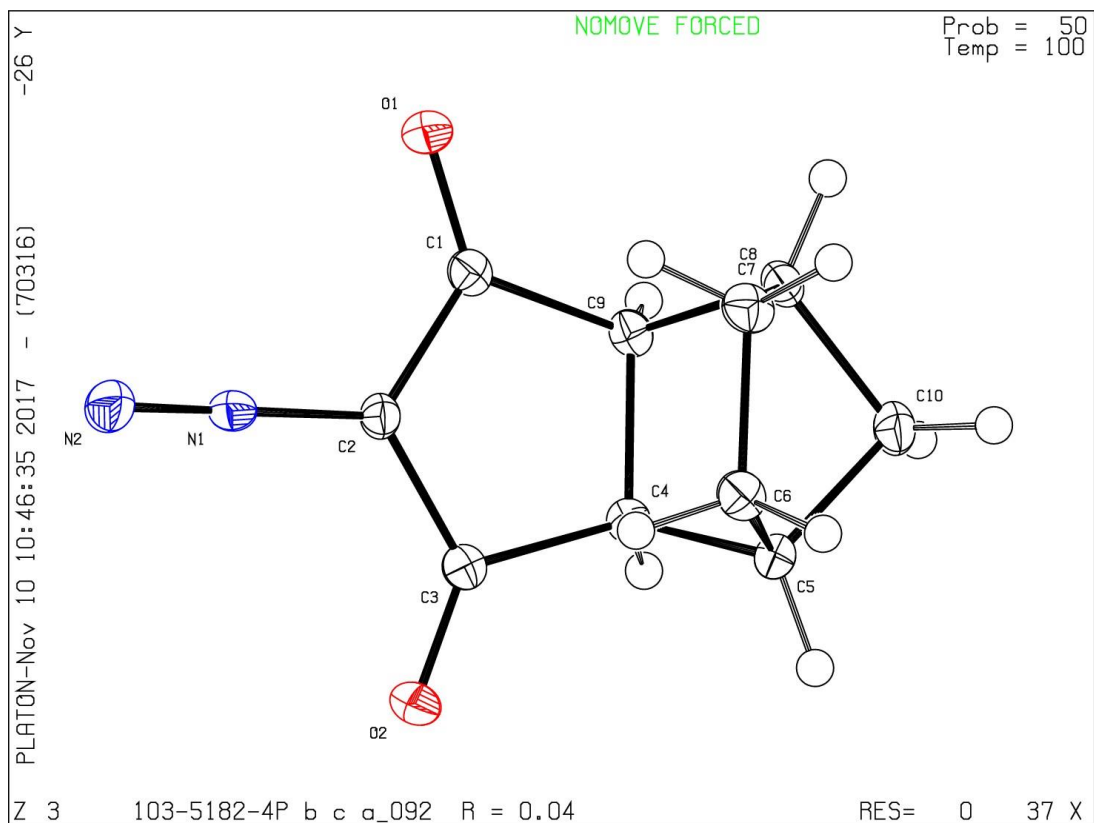

Supplement: Additional file 1 [file 1860-5397-14-200-S1.pdf]
